# Supplementary material
Source: MDPI journal article supplement (https://www.mdpi.com/2071-1050/13/1/80)
Supplement: s1 [file s1]

## Supplementary Material

### Preliminary Screening for Microplastic Concentrations in the Surface Water of the Ob and Tom Rivers in Siberia, Russia

Frank Y.A., Vorobiev E.D., Vorobiev D.S., Trifonov A.A., Antsiferov D.V., Soliman Hunter T., Wilson S.P., Strežov V.

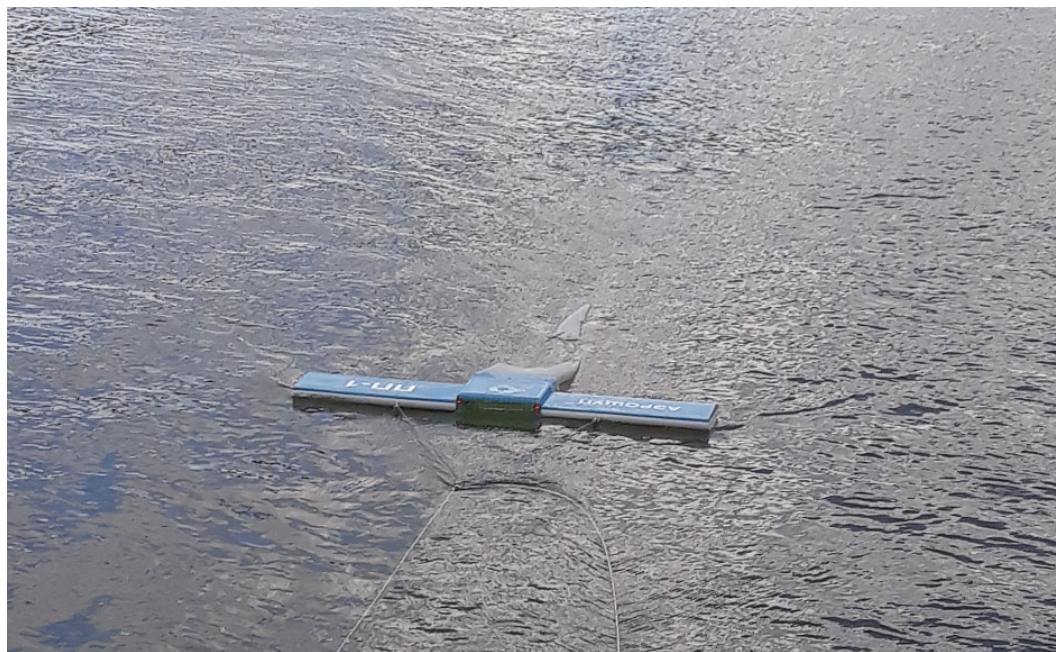

**Figure S1.** Sampling of surface water on the Ob River (Site 1-O).

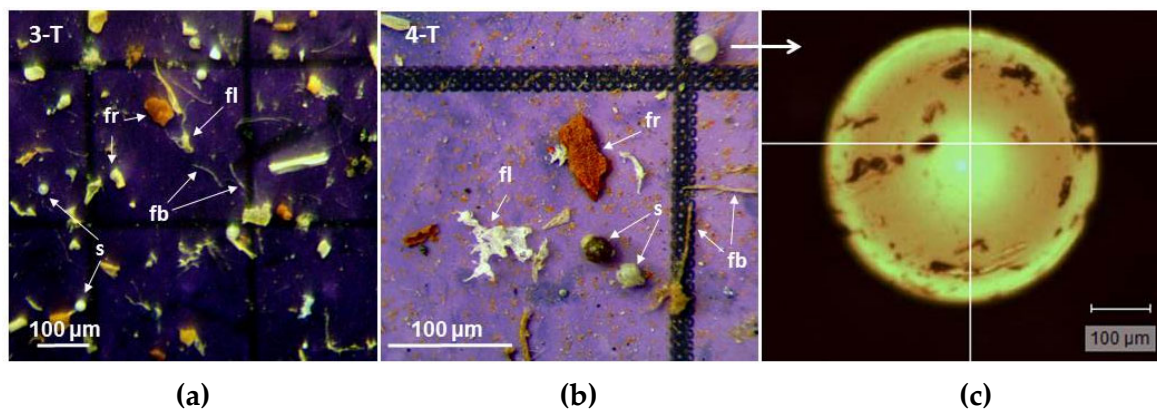

**Figure S2.** Microphotographs of recovered material. (a) and (b) – light microscopy of the MP collected in sampling sites 3-T and 4-T. Different shapes of microplastics are marked: fl – films, fr – fragments, fb – fibers, s – spheres. Scale bar is 1 mm. (c) – one of the spheres detected in surface water, site 4-T, reflected light electron microscopy. Scale bar is 100  $\mu\text{m}$ . Note: Tiny orange fragments are residues of ferrous hydroxide derived from the water.
